# Supplementary material for: sTREM-1 Predicts Disease Severity and Mortality in COVID-19 Patients: Involvement of Peripheral Blood Leukocytes and MMP-8 Activity
Source: MDPI journal article supplement (doi:10.3390/v13122521), 2021-12-15
Supplement: s1 [file s1]

### Supplementary Information

**Table S1.** Characterization of participants according to signs and symptoms of COVID-19.

| Participant's Classification | Symptoms, Signs, and Parameters                                                                                                                                                                                                                                                                                                                                                                                                                     |
|------------------------------|-----------------------------------------------------------------------------------------------------------------------------------------------------------------------------------------------------------------------------------------------------------------------------------------------------------------------------------------------------------------------------------------------------------------------------------------------------|
| Healthy Controls             | <ul style="list-style-type: none"> <li>- Negative for SARS-Cov-2 nucleic acid</li> <li>- No clinical signs</li> </ul>                                                                                                                                                                                                                                                                                                                               |
| Mild                         | <ul style="list-style-type: none"> <li>- Positive for SARS-Cov-2 nucleic acid and/or serological test</li> <li>- With or without the following symptoms: diarrhea, cough, fever, headache, loss of taste (ageusia) / smell (anosmia), myalgia, nausea, and vomiting</li> <li>- Oxygen saturation 94-99 % on room air</li> </ul>                                                                                                                     |
| Moderate                     | <ul style="list-style-type: none"> <li>- Positive for SARS-Cov-2 nucleic acid and/or serological test</li> <li>- Manifestation of mild disease symptoms including dyspnea</li> <li>- Oxygen saturation <math>\geq 93\%</math> on room air and <math>\text{PaO}_2/\text{FiO}_2</math> 250-300 mmHg</li> <li>- Do not need invasive ventilation: nasal catheter (oxygen 2-4 L/min) or oxygen reservoir (oxygen 4-12 L/min)</li> </ul>                 |
| Severe                       | <ul style="list-style-type: none"> <li>- Positive for SARS-Cov-2 nucleic acid and/or serological test</li> <li>- Possible Admission to intensive-care units</li> <li>- Severe respiratory distress</li> <li>- Oxygen saturation <math>&lt; 93\%</math> on room air and <math>\text{PaO}_2/\text{FiO}_2 &lt; 250</math> mmHg</li> <li>- Need no-invasive ventilation: oxygen reservoir or non-rebreathing face mask (oxygen 10-15 L/min)</li> </ul>  |
| Critical                     | <ul style="list-style-type: none"> <li>- Positive for SARS-Cov-2 nucleic acid and/or serological test</li> <li>- Admission to intensive-care units</li> <li>- Acute respiratory distress syndrome</li> <li>- Need invasive ventilation</li> <li>- <math>\text{PaO}_2/\text{FiO}_2 &lt; 200</math> mmHg</li> <li>- With or without one or more additional parameters: need hemodialysis, sepsis, septic shock, and multiorgan dysfunction</li> </ul> |

The participants were classified into five clinical groups, established by the symptoms severity, clinical parameters, patient's management and laboratory findings, following the WHO recommendations [1–8]. **Abbreviations:**  $\text{FiO}_2$  (fraction of inspired oxygen);  $\text{PaO}_2$  (partial pressure of oxygen).

**Table S2.** Information about  $r$  and  $p$ -values of the correlation matrix shown in Figure 2.

| Comparison | Row                | Column   | Correlation  | $P$ -value  |
|------------|--------------------|----------|--------------|-------------|
| 1          | Mild               | Moderate | -0.231155018 | 0.000332594 |
| 2          | Sat O <sub>2</sub> | Moderate | 0.256343743  | 7.28466E-05 |
| 3          | Lymphocyte         | Moderate | 0.152904628  | 0.018504855 |
| 4          | BMI                | Moderate | -0.077106244 | 0.239009016 |
| 5          | Hypertension       | Moderate | -0.004953154 | 0.940185148 |
| 6          | Male               | Moderate | -0.001387137 | 0.983052766 |
| 7          | Severe             | Moderate | -0.315407459 | 7.15624E-07 |
| 8          | Clinical Score     | Moderate | -0.361940265 | 9.56482E-09 |
| 9          | Critical           | Moderate | -0.328051133 | 2.37513E-07 |
| 10         | Neutrophil         | Moderate | -0.194937891 | 0.002577148 |
| 11         | sTREM-1            | Moderate | -0.305649126 | 1.62032E-06 |
| 12         | Age                | Moderate | -0.232030568 | 0.00031521  |
| 13         | IL-10              | Moderate | -0.099067545 | 0.171587141 |
| 14         | IL-6               | Moderate | -0.333358878 | 2.94361E-06 |
| 15         | IL-8               | Moderate | -0.205944097 | 0.005412874 |

|    |                    |                    |              |             |
|----|--------------------|--------------------|--------------|-------------|
| 16 | IL-1B              | Moderate           | -0.202705785 | 0.004695755 |
| 17 | IL-12              | Moderate           | 0.047893541  | 0.508345685 |
| 18 | TNF                | Moderate           | 0.001018876  | 0.988779933 |
| 19 | Sat O <sub>2</sub> | Mild               | 0.493797962  | 8.69017E-16 |
| 20 | Lymphocyte         | Mild               | 0.473795411  | 1.15153E-14 |
| 21 | BMI                | Mild               | -0.176923201 | 0.00654393  |
| 22 | Hypertension       | Mild               | 0.034172795  | 0.604566858 |
| 23 | Male               | Mild               | -0.187577951 | 0.003752779 |
| 24 | Severe             | Mild               | -0.319801075 | 4.90581E-07 |
| 25 | Clinical Score     | Mild               | -0.684083102 | 4.7457E-34  |
| 26 | Critical           | Mild               | -0.332620874 | 1.57451E-07 |
| 27 | Neutrophil         | Mild               | -0.486848071 | 1.65221E-15 |
| 28 | sTREM-1            | Mild               | -0.473164064 | 1.26229E-14 |
| 29 | Age                | Mild               | -0.443947281 | 7.24186E-13 |
| 30 | IL-10              | Mild               | -0.329159002 | 3.1354E-06  |
| 31 | IL-6               | Mild               | -0.524005077 | 1.19155E-14 |
| 32 | IL-8               | Mild               | -0.47734009  | 1.08997E-11 |
| 33 | IL-1B              | Mild               | 0.003209787  | 0.964663496 |
| 34 | IL-12              | Mild               | -0.033696836 | 0.641772093 |
| 35 | TNF                | Mild               | -0.028596493 | 0.693008796 |
| 36 | Lymphocyte         | Sat O <sub>2</sub> | 0.401200145  | 1.84023E-10 |
| 37 | BMI                | Sat O <sub>2</sub> | -0.235201534 | 0.000301552 |
| 38 | Hypertension       | Sat O <sub>2</sub> | -0.064325069 | 0.33249921  |
| 39 | Male               | Sat O <sub>2</sub> | -0.101669422 | 0.120916986 |
| 40 | Severe             | Sat O <sub>2</sub> | -0.306087002 | 1.82232E-06 |
| 41 | Clinical Score     | Sat O <sub>2</sub> | -0.61107148  | 2.39767E-25 |
| 42 | Critical           | Sat O <sub>2</sub> | -0.321999042 | 4.80411E-07 |
| 43 | Neutrophil         | Sat O <sub>2</sub> | -0.423331473 | 1.36418E-11 |
| 44 | sTREM-1            | Sat O <sub>2</sub> | -0.417465281 | 2.77006E-11 |
| 45 | Age                | Sat O <sub>2</sub> | -0.387049158 | 8.81104E-10 |
| 46 | IL-10              | Sat O <sub>2</sub> | -0.2948569   | 3.81076E-05 |
| 47 | IL-6               | Sat O <sub>2</sub> | -0.477628124 | 6.21986E-12 |
| 48 | IL-8               | Sat O <sub>2</sub> | -0.416622922 | 7.27459E-09 |
| 49 | IL-1B              | Sat O <sub>2</sub> | -0.092911818 | 0.202305851 |
| 50 | IL-12              | Sat O <sub>2</sub> | -0.008326473 | 0.909224231 |
| 51 | TNF                | Sat O <sub>2</sub> | -0.120279514 | 0.098329914 |
| 52 | BMI                | Lymphocyte         | 0.105807313  | 0.105686046 |
| 53 | Hypertension       | Lymphocyte         | 0.102924798  | 0.117960673 |
| 54 | Male               | Lymphocyte         | -0.195809682 | 0.002462766 |
| 55 | Severe             | Lymphocyte         | -0.24467198  | 0.000141946 |
| 56 | Clinical Score     | Lymphocyte         | -0.504559851 | 1.0349E-16  |
| 57 | Critical           | Lymphocyte         | -0.284427783 | 8.67676E-06 |
| 58 | Neutrophil         | Lymphocyte         | -0.244465784 | 0.000143855 |
| 59 | sTREM-1            | Lymphocyte         | -0.450771695 | 2.91027E-13 |
| 60 | Age                | Lymphocyte         | -0.510840741 | 3.72578E-17 |
| 61 | IL-10              | Lymphocyte         | -0.4656599   | 1.00449E-11 |
| 62 | IL-6               | Lymphocyte         | -0.570302316 | 1.30747E-17 |
| 63 | IL-8               | Lymphocyte         | -0.55135014  | 8.75794E-16 |
| 64 | IL-1B              | Lymphocyte         | -0.055937205 | 0.439722695 |

|     |                |              |              |             |
|-----|----------------|--------------|--------------|-------------|
| 65  | IL-12          | Lymphocyte   | -0.066996635 | 0.35458038  |
| 66  | TNF            | Lymphocyte   | -0.069797294 | 0.334778798 |
| 67  | Hypertension   | BMI          | 0.337632848  | 1.54209E-07 |
| 68  | Male           | BMI          | 0.010023149  | 0.878527219 |
| 69  | Severe         | BMI          | 0.090491035  | 0.16677444  |
| 70  | Clinical Score | BMI          | 0.199649214  | 0.002103156 |
| 71  | Critical       | BMI          | 0.121363246  | 0.063252208 |
| 72  | Neutrophil     | BMI          | 0.144400816  | 0.026867836 |
| 73  | sTREM-1        | BMI          | 0.080909355  | 0.216558849 |
| 74  | Age            | BMI          | -0.111379628 | 0.088452531 |
| 75  | IL-10          | BMI          | -0.064540076 | 0.375061815 |
| 76  | IL-6           | BMI          | 0.10571597   | 0.149870463 |
| 77  | IL-8           | BMI          | 0.079989279  | 0.285789589 |
| 78  | IL-1B          | BMI          | -0.048881404 | 0.500756237 |
| 79  | IL-12          | BMI          | -0.049949198 | 0.491436097 |
| 80  | TNF            | BMI          | -0.003880337 | 0.957399957 |
| 81  | Male           | Hypertension | 0.008049538  | 0.902941275 |
| 82  | Severe         | Hypertension | 0.027496362  | 0.676949976 |
| 83  | Clinical Score | Hypertension | -0.02087052  | 0.751844854 |
| 84  | Critical       | Hypertension | -0.052086696 | 0.429754465 |
| 85  | Neutrophil     | Hypertension | -0.039892941 | 0.545451521 |
| 86  | sTREM-1        | Hypertension | -0.024131327 | 0.714644644 |
| 87  | Age            | Hypertension | -0.048797374 | 0.459490751 |
| 88  | IL-10          | Hypertension | -0.176737196 | 0.015255029 |
| 89  | IL-6           | Hypertension | -0.076601215 | 0.301366345 |
| 90  | IL-8           | Hypertension | -0.155970027 | 0.037078899 |
| 91  | IL-1B          | Hypertension | -0.088646282 | 0.225133769 |
| 92  | IL-12          | Hypertension | -0.070127011 | 0.337623046 |
| 93  | TNF            | Hypertension | 0.089498929  | 0.220686885 |
| 94  | Severe         | Male         | 0.036825251  | 0.572678206 |
| 95  | Clinical Score | Male         | 0.191474889  | 0.003080732 |
| 96  | Critical       | Male         | 0.12249276   | 0.05971684  |
| 97  | Neutrophil     | Male         | 0.031451675  | 0.629982399 |
| 98  | sTREM-1        | Male         | 0.163859007  | 0.011525823 |
| 99  | Age            | Male         | 0.104158239  | 0.109738178 |
| 100 | IL-10          | Male         | 0.247127239  | 0.000548883 |
| 101 | IL-6           | Male         | 0.119514701  | 0.102335595 |
| 102 | IL-8           | Male         | 0.173228274  | 0.019697498 |
| 103 | IL-1B          | Male         | -0.140872767 | 0.050688253 |
| 104 | IL-12          | Male         | -0.051524688 | 0.476695911 |
| 105 | TNF            | Male         | -0.075172413 | 0.29879757  |
| 106 | Clinical Score | Severe       | 0.06320037   | 0.332653938 |
| 107 | Critical       | Severe       | -0.453856055 | 1.9146E-13  |
| 108 | Neutrophil     | Severe       | 0.091391754  | 0.160779086 |
| 109 | sTREM-1        | Severe       | 0.109629133  | 0.092205835 |
| 110 | Age            | Severe       | 0.223739234  | 0.000519861 |
| 111 | IL-10          | Severe       | 0.133051116  | 0.065803523 |
| 112 | IL-6           | Severe       | 0.339610294  | 1.86137E-06 |
| 113 | IL-8           | Severe       | 0.18170797   | 0.014360805 |

|     |            |                |              |             |
|-----|------------|----------------|--------------|-------------|
| 114 | IL-1B      | Severe         | -0.087249961 | 0.227607984 |
| 115 | IL-12      | Severe         | -0.047658186 | 0.510434151 |
| 116 | TNF        | Severe         | -0.166640725 | 0.020545856 |
| 117 | Critical   | Clinical Score | 0.814088698  | 2.18852E-57 |
| 118 | Neutrophil | Clinical Score | 0.60170919   | 9.89693E-25 |
| 119 | sTREM-1    | Clinical Score | 0.670648205  | 2.51929E-32 |
| 120 | Age        | Clinical Score | 0.527521057  | 2.22592E-18 |
| 121 | IL-10      | Clinical Score | 0.39350729   | 1.63783E-08 |
| 122 | IL-6       | Clinical Score | 0.706591772  | 9.50877E-30 |
| 123 | IL-8       | Clinical Score | 0.611328472  | 6.24207E-20 |
| 124 | IL-1B      | Clinical Score | 0.193142907  | 0.007119883 |
| 125 | IL-12      | Clinical Score | 0.028906508  | 0.689851391 |
| 126 | TNF        | Clinical Score | 0.13516282   | 0.060909273 |
| 127 | Neutrophil | Critical       | 0.48144692   | 3.72683E-15 |
| 128 | sTREM-1    | Critical       | 0.544209066  | 1.13204E-19 |
| 129 | Age        | Critical       | 0.345890241  | 4.59209E-08 |
| 130 | IL-10      | Critical       | 0.247996578  | 0.000523876 |
| 131 | IL-6       | Critical       | 0.435159773  | 4.35884E-10 |
| 132 | IL-8       | Critical       | 0.418124958  | 4.71667E-09 |
| 133 | IL-1B      | Critical       | 0.27583581   | 0.000103287 |
| 134 | IL-12      | Critical       | 0.036207063  | 0.617144789 |
| 135 | TNF        | Critical       | 0.200079903  | 0.005273927 |
| 136 | sTREM-1    | Neutrophil     | 0.594134952  | 5.25175E-24 |
| 137 | Age        | Neutrophil     | 0.337763026  | 9.83417E-08 |
| 138 | IL-10      | Neutrophil     | 0.251205264  | 0.000440416 |
| 139 | IL-6       | Neutrophil     | 0.409908655  | 5.16878E-09 |
| 140 | IL-8       | Neutrophil     | 0.374089043  | 2.1304E-07  |
| 141 | IL-1B      | Neutrophil     | 0.115544468  | 0.109569412 |
| 142 | IL-12      | Neutrophil     | 0.002980357  | 0.967187816 |
| 143 | TNF        | Neutrophil     | 0.159421183  | 0.026791288 |
| 144 | Age        | sTREM-1        | 0.488857505  | 1.21629E-15 |
| 145 | IL-10      | sTREM-1        | 0.347496792  | 7.87725E-07 |
| 146 | IL-6       | sTREM-1        | 0.565137436  | 2.94966E-17 |
| 147 | IL-8       | sTREM-1        | 0.579913342  | 1.18423E-17 |
| 148 | IL-1B      | sTREM-1        | 0.148895405  | 0.03877017  |
| 149 | IL-12      | sTREM-1        | 0.070661441  | 0.328814567 |
| 150 | TNF        | sTREM-1        | 0.107860689  | 0.13541786  |
| 151 | IL-10      | Age            | 0.362968733  | 2.28949E-07 |
| 152 | IL-6       | Age            | 0.560872117  | 5.71432E-17 |
| 153 | IL-8       | Age            | 0.537764866  | 5.89503E-15 |
| 154 | IL-1B      | Age            | 0.111105111  | 0.123984768 |
| 155 | IL-12      | Age            | 0.053394695  | 0.460824155 |
| 156 | TNF        | Age            | 0.083246073  | 0.249741408 |
| 157 | IL-6       | IL-10          | 0.595828669  | 1.88665E-19 |
| 158 | IL-8       | IL-10          | 0.691523071  | 4.45477E-27 |
| 159 | IL-1B      | IL-10          | 0.084361802  | 0.244669961 |
| 160 | IL-12      | IL-10          | 0.066528425  | 0.359225709 |
| 161 | TNF        | IL-10          | 0.029557013  | 0.684031098 |
| 162 | IL-8       | IL-6           | 0.75569478   | 2.30662E-34 |

|     |       |       |              |             |
|-----|-------|-------|--------------|-------------|
| 163 | IL-1B | IL-6  | 0.139639406  | 0.055973197 |
| 164 | IL-12 | IL-6  | 0.065061294  | 0.375043236 |
| 165 | TNF   | IL-6  | 0.002706864  | 0.9705909   |
| 166 | IL-1B | IL-8  | 0.042398459  | 0.57090717  |
| 167 | IL-12 | IL-8  | 0.004694633  | 0.949987402 |
| 168 | TNF   | IL-8  | -0.008794129 | 0.906467413 |
| 169 | IL-12 | IL-1B | 0.268492309  | 0.000159788 |
| 170 | TNF   | IL-1B | 0.328036453  | 3.20628E-06 |
| 171 | TNF   | IL-12 | 0.377835832  | 6.05668E-08 |

**Table S3.** Multivariate Regression Model\* for Death in the Study Population.

| Variable                             | IRR** (95% Confidence Interval) | p-value |
|--------------------------------------|---------------------------------|---------|
| <b>Sex (Male)</b>                    | 1.05 (0.75 – 1.47)              | 0.771   |
| <b>Age over 60 years</b>             | 2.05 (1.31 – 3.22)              | 0.002   |
| <b>Days of Disease</b>               | 1.01 (0.90 – 1.04)              | 0.174   |
| <b>Comorbidities</b>                 | 1.11 (0.90 – 1.24)              | 0.069   |
| <b>Severity Score</b>                | 1.65 (1.23 – 2.22)              | 0.001   |
| <b>Neutrophils-Lymphocytes Ratio</b> | 0.99 (0.90 – 1.10)              | 0.612   |
| <b>High TREM-1</b>                   | 1.05 (0.75 – 1.47)              | 0.003   |

\*Model  $p$ -value < 0.0001, Deviance Goodness-of-fit 65.35,  $p$  = 1.00, Pearson Goodness-of-fit 59.65,  $p$  = 1.00.

\*\*Incidence Rate Ratio

**Table S4.** Hospital support, supportive therapies, and medications of patients moderate, severe, and critical infected with SARS-CoV-2.

| During Hospital Stay                     | Moderate/Severe/critical<br>N=33 |
|------------------------------------------|----------------------------------|
| <b>Hospital support, No. (%)</b>         |                                  |
| Infirmary                                | 20 (60.6)                        |
| Intensive care unit (ICU)                | 13 (39.4)                        |
| <b>Hospitalization data, No.</b>         |                                  |
| Hospitalization days, median (IQR)       | 11 (3-30)                        |
| Number of days since symptom onset (IQR) | 6 (3-11)                         |
| <b>Respiratory support received (%)</b>  |                                  |
| Nasal-cannula oxygen                     | 13 (39.4)                        |
| Oxygen mask                              | 11 (33.3)                        |
| Invasive mechanical ventilation          | 9 (27.3)                         |
| Oxygen Saturation median (IQR)           | 89 (54-99)                       |
| <b>Medications</b>                       |                                  |
| Glucocorticoid                           | 31 (93.9)                        |
| Antibiotics                              | 33 (100)                         |
| Oseltamivir                              | 19 (57.6)                        |
| Chloroquine/Hydroxychloroquine           | 10 (30.3)                        |
| Anticoagulants                           | 11 (33.3)                        |
| <b>Death</b>                             | 24 (72.7)                        |

**Abbreviation:** IQR, interquartile range, Data are median (IQR), n (%), or n/N.

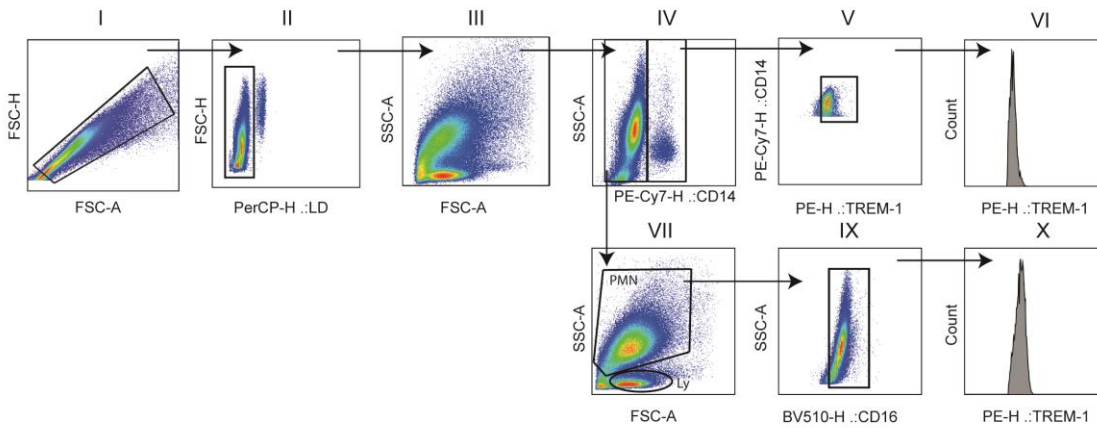

**Figure S1.** Gating strategy used for flow cytometry analysis of peripheral blood leukocytes. Dot plots shown a representative gating strategy for the analysis of (I) singlet gating based FSC-H/FSC-A, (II) FSC-H/FVS-620 (viable cells), (III) SSC-A/FSC-A, followed by (IV) SSC-A/ leukocytes gated according to their side scatter and CD14 (PE-Cy7) antibody staining patterns, (V) CD14 (PE-Cy7) antibody staining patterns versus TREM-1 (PE) antibody staining patterns, with subsequent (VI) TREM-1 (PE) mean fluorescence intensity (MFI); (VII) light scatter flow cytometry profile for cells based on forward scatter (FSC-A) related to size, and side scatters (SSC-A) related to granularity; (IX) gated according to their side scatter and CD16 (BV510) antibody staining patterns, with subsequent (X) TREM-1 mean fluorescence intensity (MFI).

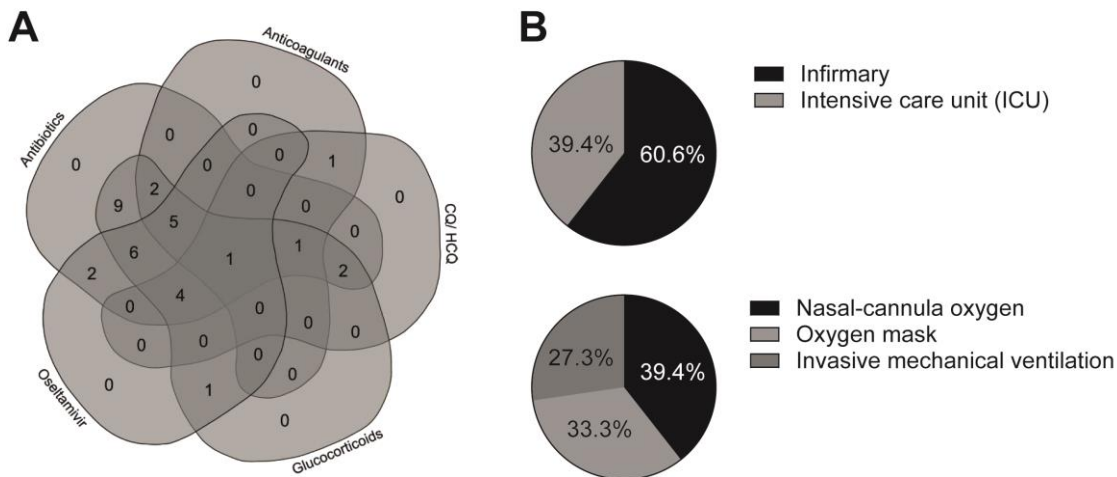

**Figure S2.** Venn diagram of the pharmacological treatment of patients with COVID-19 and hospital/ respiratory support during hospitalization. (A) Venn diagram showed all pharmacological treatment relations between Glucocorticoid, Antibiotics, Oseltamivir, Chloroquine/Hydroxychloroquine and Anticoagulants of different sets of patients with COVID-19 in hospital care. (B) Demonstrative percentages of patients in distinctive hospitals and respiratory support during hospitalization.

## References

1. Ye, G.; Pan, Z.; Pan, Y.; Deng, Q.; Chen, L.; Li, J.; Li, Y.; Wang, X. Clinical Characteristics of Severe Acute Respiratory Syndrome Coronavirus 2 Reactivation. *Journal of Infection* **2020**, *80*, doi:10.1016/j.jinf.2020.03.001.
2. Xu, X.W.; Wu, X.X.; Jiang, X.G.; Xu, K.J.; Ying, L.J.; Ma, C.L.; Li, S.B.; Wang, H.Y.; Zhang, S.; Gao, H.N.; et al. Clinical Findings in a Group of Patients Infected with the 2019 Novel Coronavirus (SARS-Cov-2) Outside of Wuhan, China: Retrospective Case Series. *The BMJ* **2020**, *368*, doi:10.1136/bmj.m606.
3. Grasselli, G.; Zangrillo, A.; Zanella, A.; Antonelli, M.; Cabrini, L.; Castelli, A.; Cereda, D.; Coluccello, A.; Foti, G.; Fumagalli, R.; et al. Baseline Characteristics and Outcomes of 1591 Patients Infected with SARS-CoV-2 Admitted to ICUs of the Lombardy Region, Italy. *JAMA - Journal of the American Medical Association* **2020**, *323*, 1574–1581, doi:10.1001/jama.2020.5394.
4. Marshall, J.C.; Murthy, S.; Diaz, J.; Adhikari, N.; Angus, D.C.; Arabi, Y.M.; Baillie, K.; Bauer, M.; Berry, S.; Blackwood, B.; et al. A Minimal Common Outcome Measure Set for COVID-19 Clinical Research. *The Lancet Infectious Diseases* **2020**, *20*.
5. Office, W.H.O.E.M.R. Updated Clinical Management Guideline for COVID-19. *Weekly Epidemiology Monitor* **2020**, *13*.
6. Wei, P.-F. Diagnosis and Treatment Protocol for Novel Coronavirus Pneumonia (Trial Version 7). *Chinese Medical Journal* **2020**, *133*, 1087–1095, doi:10.1097/CM9.0000000000000819.
7. Wan, S.; Xiang, Y.; Fang, W.; Zheng, Y.; Li, B.; Hu, Y.; Lang, C.; Huang, D.; Sun, Q.; Xiong, Y.; et al. Clinical Features and Treatment of COVID-19 Patients in Northeast Chongqing. *Journal of Medical Virology* **2020**, *92*, 797–806, doi:10.1002/jmv.25783.
8. Hadjadj, J.; Yatim, N.; Barnabei, L.; Corneau, A.; Boussier, J.; Smith, N.; Péré, H.; Charbit, B.; Bondet, V.; Chenevier-Gobeaux, C.; et al. Impaired Type I Interferon Activity and Inflammatory Responses in Severe COVID-19 Patients. *Science* **2020**, *369*, doi:10.1126/science.abc6027.
